# Supplementary material for: Neuro-Urology and Biobanking: An Integrated Approach for Advancing Research and Improving Patient Care
Source: MDPI journal article supplement (doi:10.3390/ijms241814281), 2023-09-19
Supplement: s1 [file s1]

## SUPPLEMENTARY DATA

A systematic search was performed using the Pubmed database ([www.pubmed.gov](http://www.pubmed.gov)) to answer the following research questions:

Over the last 10 years (Jan 2012- Dec 2022):

1. How many studies were published in the neuro-uological research field where biobanking had been part of the study?
2. How many studies were published in which both biobanking was undertaken and neuro-uological aspects were investigated in the following relevant disease areas: Alzheimer's Disease, Spinal Cord Injury, Multiple Sclerosis, Parkinson's Disease, Stroke, Diabetes or Spina Bifida?

### Methods:

A search was performed using the "advanced" function at [www.pubmed.gov](http://www.pubmed.gov) on August 11, 2023.

A species restriction was applied to humans.

A publication date range restriction was applied from 1.1.2012 to 31.12.2022.

Searches included terms related to the topics "biobanking/biomarkers" and "neuro-uology" which were then combined with terms specific to the diseases: Alzheimer's Disease, Spinal Cord Injury, Multiple Sclerosis, Parkinson's Disease, Stroke, Diabetes, and Spina Bifida. In total, 11 separate advanced searches were performed.

SEARCH 1: "Biobank terms"

*(Biobank[Title/Abstract]*  
*OR Biobanking[Title/Abstract]*  
*OR "Biological resource center"[Title/Abstract]*  
*OR "Biological sample repository"[Title/Abstract]*  
*OR "Specimen bank"[Title/Abstract]*  
*OR "Tissue bank"[Title/Abstract]*  
*OR Biorepository[Title/Abstract]*  
*OR Biocollection[Title/Abstract]*  
*OR "Biospecimen repository"[Title/Abstract]*  
*OR "Bioresource center"[Title/Abstract]*  
*OR "Biomedical repository"[Title/Abstract]*  
*OR "Human specimen bank"[Title/Abstract]*  
*OR "Biological sample storage"[Title/Abstract]*  
*OR "Specimen preservation"[Title/Abstract]*  
*OR "Biorepository management"[Title/Abstract]*  
*OR "Biospecimen banking"[Title/Abstract]*  
*OR "Biocollection management"[Title/Abstract]*  
*OR "Sample archive"[Title/Abstract]*  
*OR "Tissue banking"[Title/Abstract]*  
*OR "Specimen processing and storage"[Title/Abstract]*  
*OR "Human sample bank"[Title/Abstract]*

OR "Genetic bank"[Title/Abstract]  
 OR "Cell bank"[Title/Abstract]  
 OR "DNA bank"[Title/Abstract]  
 OR "Blood bank"[Title/Abstract]  
 OR "Organ bank"[Title/Abstract]  
 OR "Biomaterial bank"  
 OR "Living biobank"[Title/Abstract]  
 OR "Cryobank"[Title/Abstract]  
 OR "Biospecimen handling"[Title/Abstract]  
 OR "Biobank operations"[Title/Abstract]  
 OR "Biobank administration"[Title/Abstract]  
 OR "Specimen bank"[Title/Abstract]  
 OR "Sample repository"[Title/Abstract]  
 OR "Biospecimen repository"[Title/Abstract]  
 OR Samples[Title/Abstract]  
 OR "Sample collection"[Title/Abstract]  
 OR "Biomarkers"[Title/Abstract]  
 OR "Markers"[Title/Abstract]  
 OR "Tissue collection"[Title/Abstract]  
 OR "Tissue"[Title/Abstract]  
 OR "Tissues"[Title/Abstract]  
 OR "Biological Specimen Banks"[Mesh]  
 OR "Biomarkers"[Mesh]  
 AND ((humans[Filter]) AND (2012/1/1:2022/12/31[pdat]))

## SEARCH 2: "Neuro-urology terms"

This search was split into three separate search strategies, either including neoplasms/cancer and generic terms not pointing directly to the neuro-urological field (search 2A, indicated in green below in Table S.1), or excluding neoplasms but including generic terms not pointing directly to the neuro-urological field (search 2B, in yellow), or excluding both neoplasms/cancer and generic terms not pointing directly to the neuro-urological field (search 2C, in blue).

Table S.1. Search terms related to neuro-urology, divided into three different search strategies (SEARCH 2A, 2B, 2C)

|           |           |           |                                                                                                                                                                                                                                                                                                                                                                                                                                                                                                                                                                                                                                                                                                                                                                                                                                                                                                                                                                                                                                                                                                                                                                                                                                                                                                                                                                                                                                                                                                                                                                                                                          |                        |  |  |
|-----------|-----------|-----------|--------------------------------------------------------------------------------------------------------------------------------------------------------------------------------------------------------------------------------------------------------------------------------------------------------------------------------------------------------------------------------------------------------------------------------------------------------------------------------------------------------------------------------------------------------------------------------------------------------------------------------------------------------------------------------------------------------------------------------------------------------------------------------------------------------------------------------------------------------------------------------------------------------------------------------------------------------------------------------------------------------------------------------------------------------------------------------------------------------------------------------------------------------------------------------------------------------------------------------------------------------------------------------------------------------------------------------------------------------------------------------------------------------------------------------------------------------------------------------------------------------------------------------------------------------------------------------------------------------------------------|------------------------|--|--|
| SEARCH 2A | SEARCH 2B | SEARCH 2C | "Neurogenic urology"[Title/Abstract]<br>OR "Neurogenic bladder"[Title/Abstract]<br>OR "Neurogenic voiding dysfunction"[Title/Abstract]<br>OR "Neurogenic lower urinary tract dysfunction"[Title/Abstract]<br>OR "Lower urinary tract"[Title/Abstract]<br>OR "Neurogenic incontinence"[Title/Abstract]<br>OR "Neuro-urodynamics"[Title/Abstract]<br>OR "Urodynamics in neurology"[Title/Abstract]<br>OR "Neurological urology"[Title/Abstract]<br>OR "Neurogenic urinary disorders"[Title/Abstract]<br>OR "Neurogenic urological conditions"[Title/Abstract]<br>OR "Neurogenic voiding disorders"[Title/Abstract]<br>OR "Neuro-urological conditions"[Title/Abstract]<br>OR "Neuro-urologic disorders"[Title/Abstract]<br>OR "Neuromuscular urology"[Title/Abstract]<br>OR "Uro-neurology"[Title/Abstract]<br>OR "Neurogenic bladder dysfunction"[Title/Abstract]<br>OR "Neurogenic lower urinary tract disorders"[Title/Abstract]<br>OR "Neurogenic urinary tract dysfunction"[Title/Abstract]<br>OR "Neuro-urological diagnostics"[Title/Abstract]<br>OR "Lower Urinary Tract Symptoms"[Mesh]<br>OR "Urinary Incontinence, Urge"[Mesh]<br>OR "Urinary Bladder, Overactive"[Mesh]<br>OR "Urinary Bladder, Underactive"[Mesh]<br>OR "Urinary Incontinence"[Mesh]<br><del>OR "Urinary Bladder, Neurogenic"[Mesh]</del> -----<br>OR "Urinary Tract"[Mesh]<br>OR "Urinary Retention"[Mesh]<br>OR "Urinary Bladder Diseases"[Mesh]<br>OR "Urinary Bladder"[Mesh]<br><del>OR "Urologic Diseases"[Mesh]</del> -----<br>OR "Urinary Bladder Neoplasms"[Mesh]<br>OR "Urologic Neoplasms"[Mesh]<br>OR "Urogenital Neoplasms"[Mesh] | Neuro-urology terms    |  |  |
|           |           |           |                                                                                                                                                                                                                                                                                                                                                                                                                                                                                                                                                                                                                                                                                                                                                                                                                                                                                                                                                                                                                                                                                                                                                                                                                                                                                                                                                                                                                                                                                                                                                                                                                          | Generic urology terms  |  |  |
|           |           |           |                                                                                                                                                                                                                                                                                                                                                                                                                                                                                                                                                                                                                                                                                                                                                                                                                                                                                                                                                                                                                                                                                                                                                                                                                                                                                                                                                                                                                                                                                                                                                                                                                          | Neoplasms/cancer terms |  |  |
|           |           |           | AND ((humans[Filter]) AND (2012/1/1:2022/12/31[pdat]))                                                                                                                                                                                                                                                                                                                                                                                                                                                                                                                                                                                                                                                                                                                                                                                                                                                                                                                                                                                                                                                                                                                                                                                                                                                                                                                                                                                                                                                                                                                                                                   |                        |  |  |

SEARCH 1 and SEARCH 2 (either 2A, 2B or 2C) were then combined with terms addressing the following relevant diseases:

SEARCH 3 "Alzheimer Disease" = SEARCH 1 "Biobank terms" AND SEARCH 2 (2A, 2B, or 2C) "Neuro-urology terms" AND the following "Alzheimer Disease" terms:

|                                                                                                                                      |                                                                 |
|--------------------------------------------------------------------------------------------------------------------------------------|-----------------------------------------------------------------|
| Alzheimer[Title/Abstract]<br>OR "Alzheimer's"[Title/Abstract]<br>OR "Alzheimer-type"[Title/Abstract]<br>OR "Alzheimer Disease"[Mesh] | (73'861 results were found by entering these search terms only) |
| AND ((humans[Filter]) AND<br>(2012/1/1:2022/12/31[pdat]))                                                                            |                                                                 |

SEARCH 4 "Spinal Cord Injury" = SEARCH 1 "Biobank terms" AND SEARCH 2 (2A, 2B, or 2C) "Neuro-urology terms" AND the following "Spinal Cord Injury" terms:

|                                                                                                                                                                                |                                                                 |
|--------------------------------------------------------------------------------------------------------------------------------------------------------------------------------|-----------------------------------------------------------------|
| "Spinal Cord Injury"[Title/Abstract]<br>OR "Spinal Cord Injuries"[Title/Abstract]<br>OR Paraplegia[Title/Abstract]<br>OR "Spinal Cord Injuries"[Mesh]<br>OR "Paraplegia"[Mesh] | (22'059 results were found by entering these search terms only) |
| AND ((humans[Filter]) AND (2012/1/1:2022/12/31[pdat]))                                                                                                                         |                                                                 |

SEARCH 5 "Multiple Sclerosis" = SEARCH 1 "Biobank terms" AND SEARCH 2 (2A, 2B, or 2C) "Neuro-urology terms" AND the following "Multiple Sclerosis" terms:

|                                                                       |                                                                 |
|-----------------------------------------------------------------------|-----------------------------------------------------------------|
| "Multiple Sclerosis"[Title/Abstract]<br>OR "Multiple Sclerosis"[Mesh] | (36'172 results were found by entering these search terms only) |
| AND ((humans[Filter]) AND (2012/1/1:2022/12/31[pdat]))                |                                                                 |

SEARCH 6 "Parkinson Disease" = SEARCH 1 "Biobank terms" AND SEARCH 2 (2A, 2B, or 2C) "Neuro-urology terms" AND the following "Parkinson Disease" terms:

|                                                                                                                                                         |                                                                 |
|---------------------------------------------------------------------------------------------------------------------------------------------------------|-----------------------------------------------------------------|
| "Parkinson Disease"[Title/Abstract]<br>OR "Parkinsonian Disorders"[Title/Abstract]<br>OR "Parkinson Disease"[Mesh]<br>OR "Parkinsonian Disorders"[Mesh] | (41'306 results were found by entering these search terms only) |
| AND ((humans[Filter]) AND (2012/1/1:2022/12/31[pdat]))                                                                                                  |                                                                 |

SEARCH 7 "Stroke" = SEARCH 1 "Biobank terms" AND SEARCH 2 (2A, 2B, or 2C) "Neuro-urology terms" AND the following "Stroke" terms:

|                                                        |                                                                  |
|--------------------------------------------------------|------------------------------------------------------------------|
| Stroke[Title/Abstract]<br>OR Stroke[Mesh]              | (147'399 results were found by entering these search terms only) |
| AND ((humans[Filter]) AND (2012/1/1:2022/12/31[pdat])) |                                                                  |

SEARCH 8 "Diabetes" = SEARCH 1 "Biobank terms" AND SEARCH 2 (2A, 2B, or 2C) "Neuro-urology terms" AND the following "Diabetes" terms:

|                                                                                                                                                               |                                                                 |
|---------------------------------------------------------------------------------------------------------------------------------------------------------------|-----------------------------------------------------------------|
| "Diabetic Neuropathies"[Title/Abstract]<br>OR "Diabetic Nephropathy"[Title/Abstract]<br>OR "Diabetic Nephropathies"[Mesh]<br>OR "Diabetic Neuropathies"[Mesh] | (20'290 results were found by entering these search terms only) |
| AND ((humans[Filter]) AND (2012/1/1:2022/12/31[pdat]))                                                                                                        |                                                                 |

SEARCH 9 "Spina Bifida" = SEARCH 1 "Biobank terms" AND SEARCH 2 (2A, 2B, or 2C) "Neuro-urology terms" AND the following "Spina Bifida" terms:

|                                                                                                                                                                                |                                                                |
|--------------------------------------------------------------------------------------------------------------------------------------------------------------------------------|----------------------------------------------------------------|
| "Spina Bifida"[Title/Abstract]<br>OR "Spinal Dysraphism"[Title/Abstract]<br>OR "Spinal Dysraphism"[Mesh]<br>OR "Spina Bifida Cystica"[Mesh]<br>OR "Spina Bifida Occulta"[Mesh] | (2'951 results were found by entering these search terms only) |
|--------------------------------------------------------------------------------------------------------------------------------------------------------------------------------|----------------------------------------------------------------|

|                                                        |  |
|--------------------------------------------------------|--|
| AND ((humans[Filter]) AND (2012/1/1:2022/12/31[pdat])) |  |
|--------------------------------------------------------|--|

## Results:

The results of the different searches are depicted in Table S.2. Searches including SEARCH 2C are depicted in Figure 1 in the manuscript.

Table S.2. Results of the search strategies.

| Search strategy          |                                                                                                                                             | Number of results |
|--------------------------|---------------------------------------------------------------------------------------------------------------------------------------------|-------------------|
|                          | SEARCH 1 "Biobank terms"                                                                                                                    | 1'247'877*        |
|                          |                                                                                                                                             |                   |
| Searches incl. SEARCH 2A | SEARCH 2A "Neuro-urology terms", including neoplasms/cancer and generic terms not pointing directly to the neuro-urological field           | 419'068           |
|                          | SEARCH 1 AND SEARCH 2A                                                                                                                      | 105'862           |
|                          |                                                                                                                                             |                   |
|                          | SEARCH 3 "Alzheimer Disease"                                                                                                                | 68                |
|                          | SEARCH 4 "Spinal Cord Injury"                                                                                                               | 103               |
|                          | SEARCH 5 "Multiple Sclerosis"                                                                                                               | 37                |
|                          | SEARCH 6 "Parkinson Disease"                                                                                                                | 23                |
|                          | SEARCH 7 "Stroke"                                                                                                                           | 569               |
|                          | SEARCH 8 "Diabetes"                                                                                                                         | 3'027             |
|                          | SEARCH 9 "Spina Bifida"                                                                                                                     | 37                |
|                          |                                                                                                                                             |                   |
|                          |                                                                                                                                             |                   |
| Searches incl. SEARCH 2B | SEARCH 2B "Neuro-urology terms", excluding neoplasms/cancer and including generic terms not pointing directly to the neuro-urological field | 268'111           |
|                          | SEARCH 1 AND SEARCH 2B                                                                                                                      | 55'307            |
|                          |                                                                                                                                             |                   |
|                          | SEARCH 3 "Alzheimer Disease"                                                                                                                | 53                |
|                          | SEARCH 4 "Spinal Cord Injury"                                                                                                               | 86                |
|                          | SEARCH 5 "Multiple Sclerosis"                                                                                                               | 32                |
|                          | SEARCH 6 "Parkinson Disease"                                                                                                                | 18                |
|                          | SEARCH 7 "Stroke"                                                                                                                           | 542               |
|                          | SEARCH 8 "Diabetes"                                                                                                                         | 3'027             |
|                          | SEARCH 9 "Spina Bifida"                                                                                                                     | 36                |
|                          |                                                                                                                                             |                   |
|                          |                                                                                                                                             |                   |
| Searches incl. SEARCH 2C | SEARCH 2C "Neuro-urology terms", excluding neoplasms/cancer and generic terms not pointing directly to the neuro-urological field           | 22'458            |
|                          | SEARCH 1 AND SEARCH 2C                                                                                                                      | 1'922 / 1'605**   |
|                          |                                                                                                                                             |                   |
|                          | SEARCH 3 "Alzheimer Disease"                                                                                                                | 0                 |
|                          | SEARCH 4 "Spinal Cord Injury"                                                                                                               | 40                |
|                          | SEARCH 5 "Multiple Sclerosis"                                                                                                               | 9                 |

|  |                              |    |
|--|------------------------------|----|
|  | SEARCH 6 "Parkinson Disease" | 4  |
|  | SEARCH 7 "Stroke"            | 4  |
|  | SEARCH 8 "Diabetes"          | 3  |
|  | SEARCH 9 "Spina Bifida"      | 21 |

\*of note, the bottom MSH term "Biomarkers" was responsible for more than half i.e. >1 mO of the search query outcome.

\*\*Despite attempts to exclude reports in cancer patients, we found that in several of the 1'922 publications, prostate or bladder cancer was found to be a key word or the main topic of the study. We therefore made this search more stringent by adding the terms "NOT ("prostate cancer" OR "bladder cancer")", resulting in a total of 1'605 publications.

### Conclusions:

1. Between 2012 and 2022, a total of 1'605 publications were found to include both neuro-urological search terms and biobanking search terms.
2. Of these 1'605 publications, a total of 81 were specifically linked to Spinal Cord Injury (40), Multiple Sclerosis (9), Parkinson's Disease (4), Stroke (4), Diabetes (3), and Spina Bifida (21).
